# Supplementary material for: VITCOMIC2: visualization tool for the phylogenetic composition of microbial communities based on 16S rRNA gene amplicons and metagenomic shotgun sequencing
Source: PubMed Central journal article supplement (PMC5861490; doi:10.1186/s12918-018-0545-2), 2018-03-19

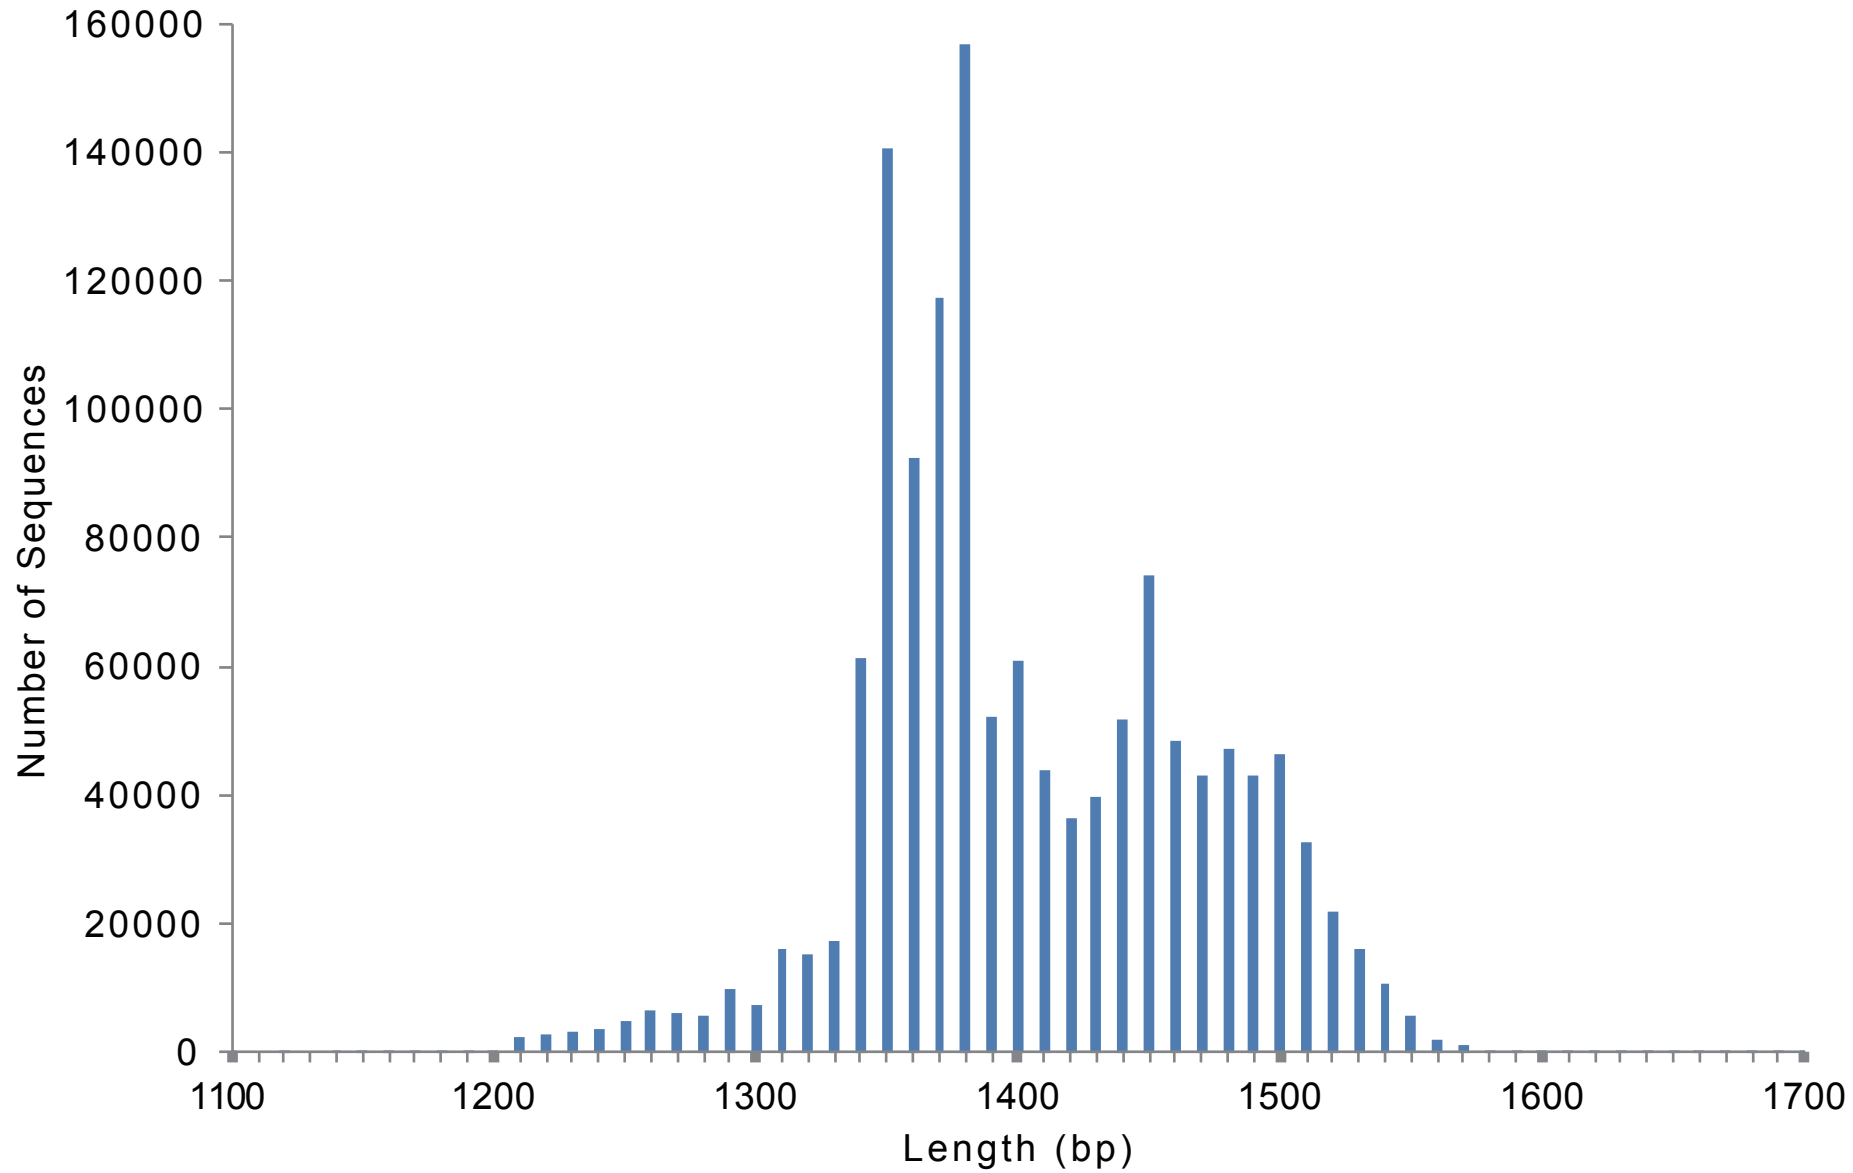

Supplement: 12918_2018_545_MOESM1_ESM.pdf [file 12918_2018_545_MOESM1_ESM.pdf]
